# Supplementary material
Source: PubMed Central journal article supplement (PMC6054502)
Supplement: DC180277SupplementaryData.pdf [file DC180277SupplementaryData.pdf]

SUPPLEMENTARY DATA

Supplementary Figure 1. Study design and timing of measurements

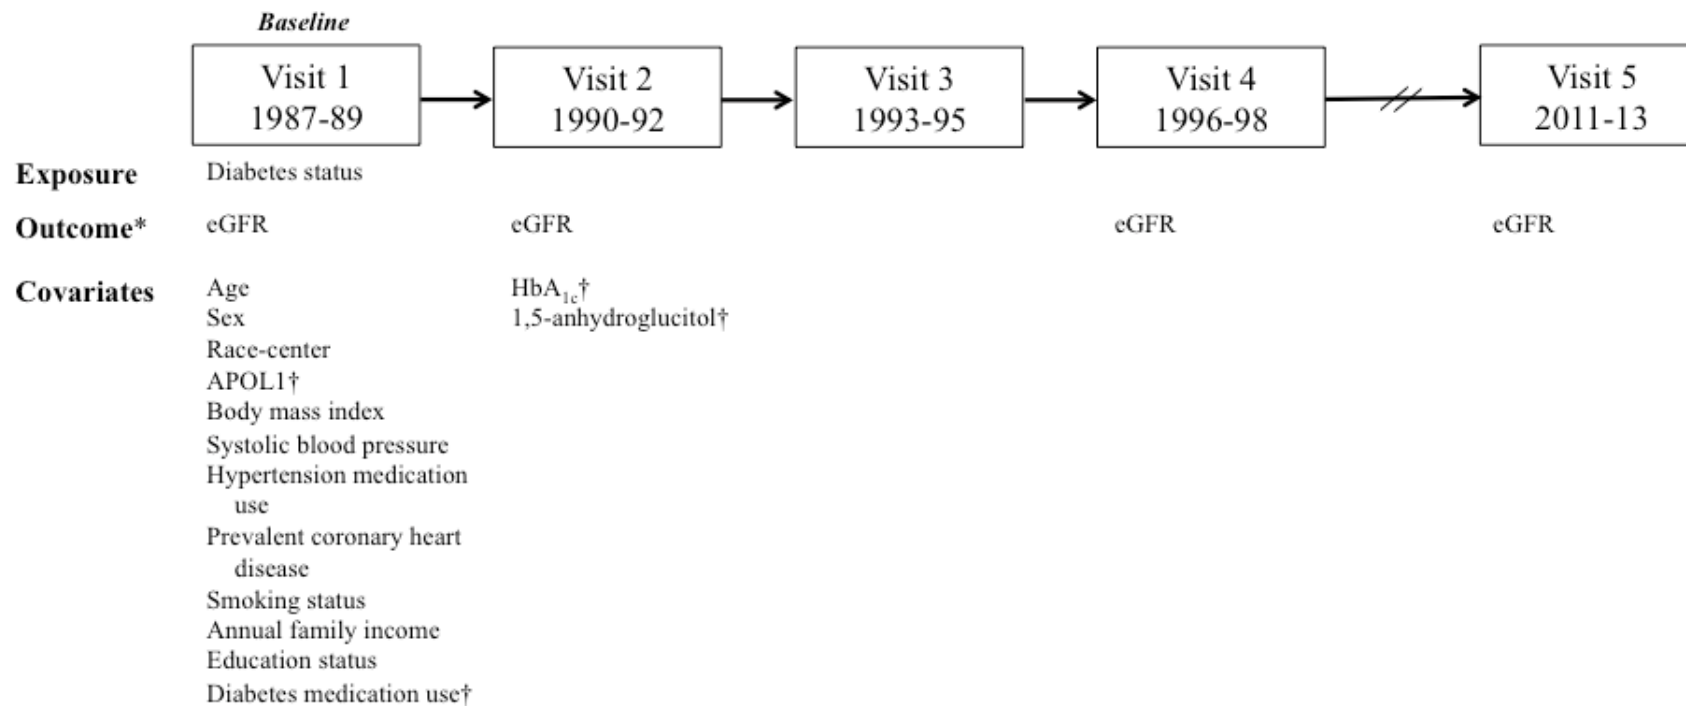

*Variables used for overall analyses unless otherwise indicated*

\* In addition to continuous follow-up for end stage renal disease through USRDS

† Table 2

SUPPLEMENTARY DATA

Supplementary Figure 2. Scatterplot of eGFR and age according to visit with lowess smoothers by diabetes status at baseline

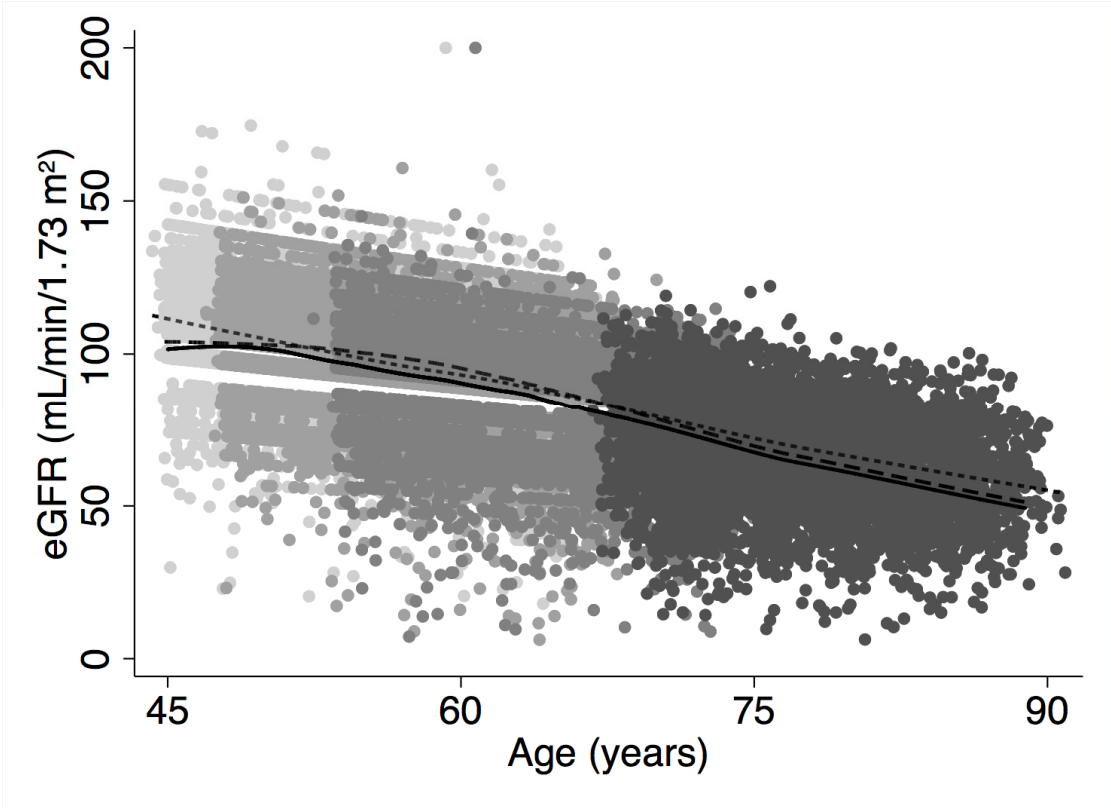

SUPPLEMENTARY DATA

**Supplementary Figure 3. Distribution of unadjusted and adjusted annual eGFR slopes from Visit 2 to Visit 5, by diabetes status**  
**Unadjusted Adjusted**

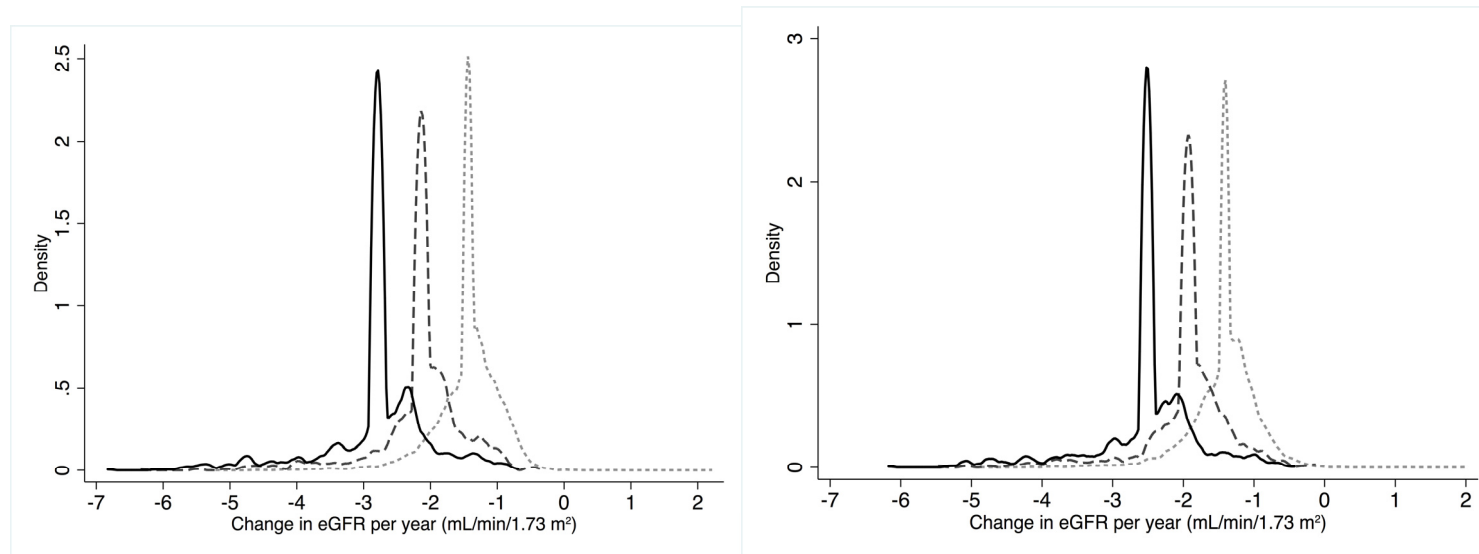

**Percentile and corresponding change in eGFR per year (mL/min/1.73m<sup>2</sup>)**

|                             | Unadjusted       |                  |                  |                  |                  | Adjusted*        |                  |                  |                  |                  |
|-----------------------------|------------------|------------------|------------------|------------------|------------------|------------------|------------------|------------------|------------------|------------------|
|                             | 10 <sup>th</sup> | 25 <sup>th</sup> | 50 <sup>th</sup> | 75 <sup>th</sup> | 90 <sup>th</sup> | 10 <sup>th</sup> | 25 <sup>th</sup> | 50 <sup>th</sup> | 75 <sup>th</sup> | 90 <sup>th</sup> |
| <b>No diabetes</b>          | -2.0             | -1.6             | -1.4             | -1.2             | -0.9             | -1.9             | -1.6             | -1.4             | -1.2             | -1.0             |
| <b>Undiagnosed diabetes</b> | -2.8             | -2.2             | -2.1             | -1.9             | -1.5             | -2.5             | -2.0             | -1.9             | -1.7             | -1.4             |
| <b>Diagnosed diabetes</b>   | -3.7             | -2.8             | -2.8             | -2.4             | -2.0             | -3.4             | -2.5             | -2.5             | -2.2             | -1.8             |

\* Adjusted for the following characteristics at baseline and their interactions with time, continuous variables centered at their means: age (ref=54.67 years), sex (ref=male), race-center (ref=Forsyth County-White; Forsyth County-Black, Jackson-Black, Minneapolis-White, Washington County-White), systolic blood pressure (ref=121.22 mmHg), hypertension medication use (ref=no; yes), body mass index (ref=27.68 kg/m<sup>2</sup>), HDL (ref=51.60 mg/dL), prevalent coronary heart disease (ref=no; yes), smoking status (ref=never; former, current), annual family income (ref: <\$25,000; ≥\$25,000), and educational status (ref: high school; less than high school, vocational school, college, graduate/professional school)

SUPPLEMENTARY DATA

**Legend**

.....No diabetes    - - - - -Undiagnosed diabetes    ——— Diagnosed diabetes

**Supplementary Table 1. Adjusted mean annual decline in eGFR by diabetes status without assignment of 15 ml/min/1.73m<sup>2</sup> at time of onset of end stage renal disease**

| <b>Diabetes status</b> | <b>Adjusted* mean annual decline in eGFR (ml/min/1.73m<sup>2</sup>)</b> | <b>Difference from reference (REF)</b> | <b><i>p</i>-value for difference</b> |
|------------------------|-------------------------------------------------------------------------|----------------------------------------|--------------------------------------|
| No diabetes            | -1.4 (-1.5, -1.4)                                                       | 0 (REF)                                |                                      |
| Undiagnosed diabetes   | -1.6 (-1.8, -1.5)                                                       | -0.2 (-0.3, -0.1)                      | 0.005                                |
| Diagnosed diabetes     | -2.0 (-2.2, -1.9)                                                       | -0.6 (-0.7, -0.5)                      | <0.001                               |

\* Adjusted for the following characteristics at baseline and their interactions with time, continuous variables centered at their means: age (ref=54.67 years), sex (ref=male), race-center (ref=Forsyth County-White; Forsyth County-Black, Jackson-Black, Minneapolis-White, Washington County-White), systolic blood pressure (ref=121.22 mmHg), hypertension medication use (ref=no; yes), body mass index (ref=27.68 kg/m<sup>2</sup>), HDL (ref=51.60 mg/dL), prevalent coronary heart disease (ref=no; yes), smoking status (ref=never; former, current), annual family income (ref: <\$25,000; ≥\$25,000), and educational status (ref: high school; less than high school, vocational school, college, graduate/professional school)
